# Supplementary figures and images for: In situ profiling of lithium/Ag2VP2O8primary batteries using energy dispersive X-ray diffraction
Source: Royal Society of Chemistry journal article supplement (doi:10.1039/c4cp01220h), 2014-01-01

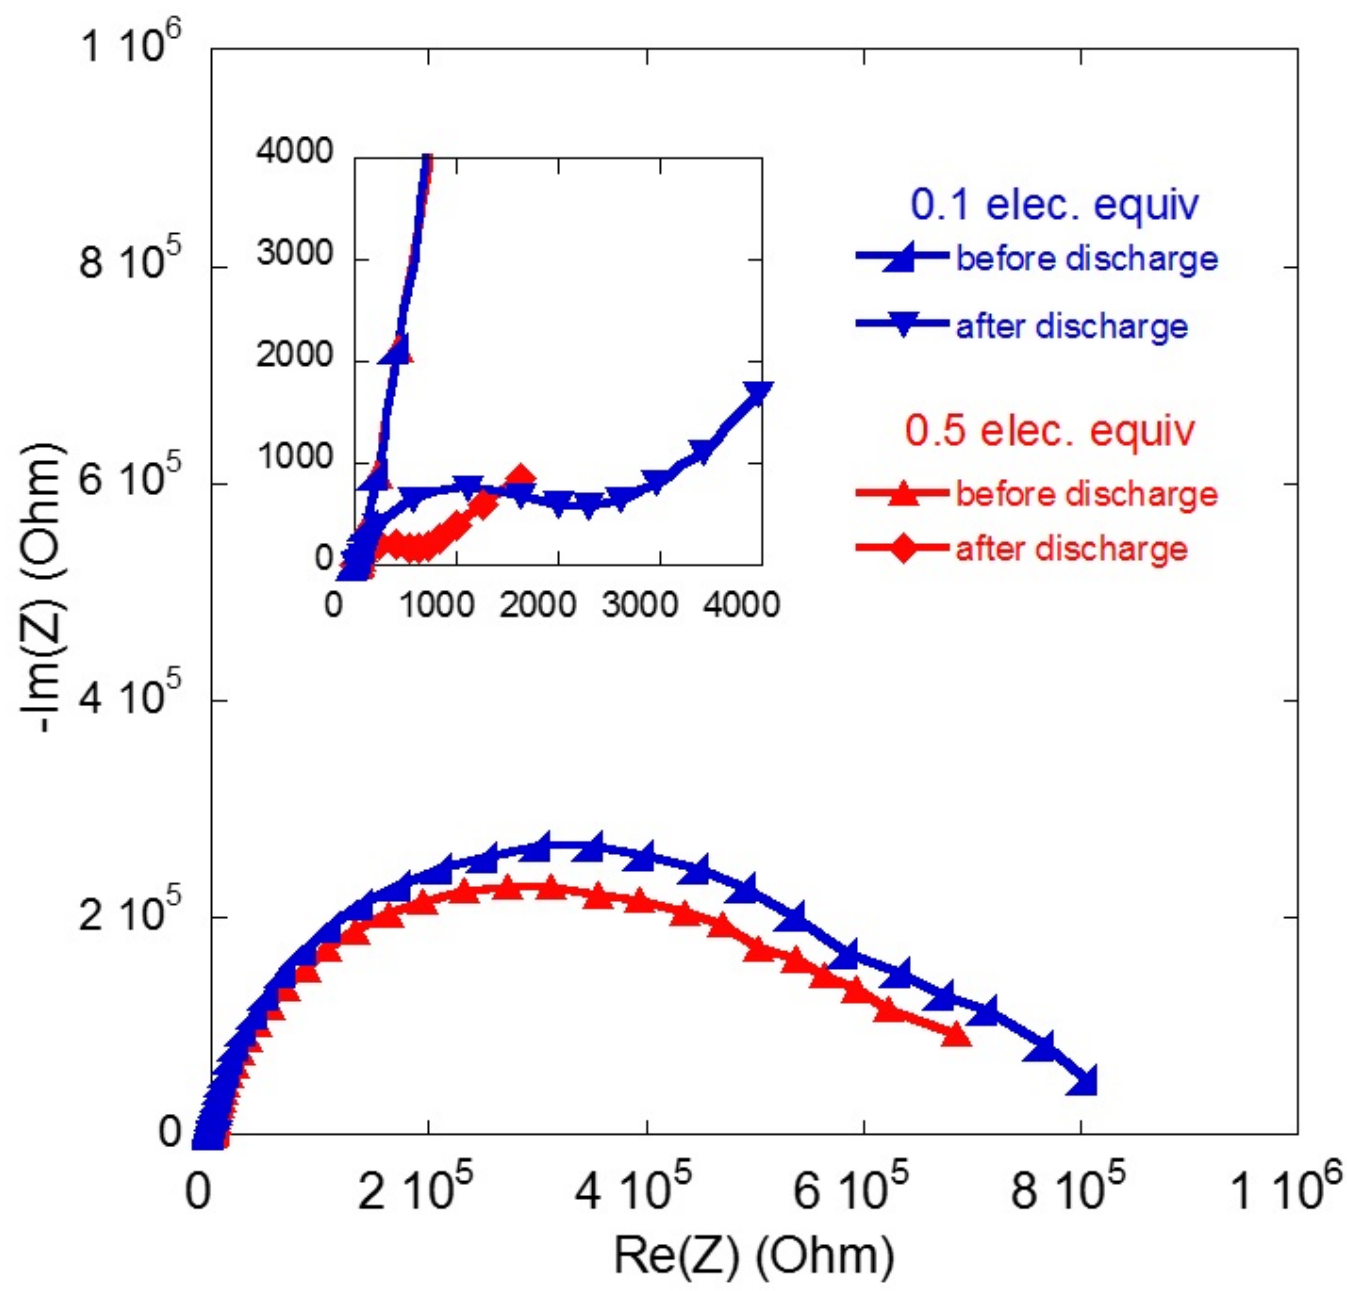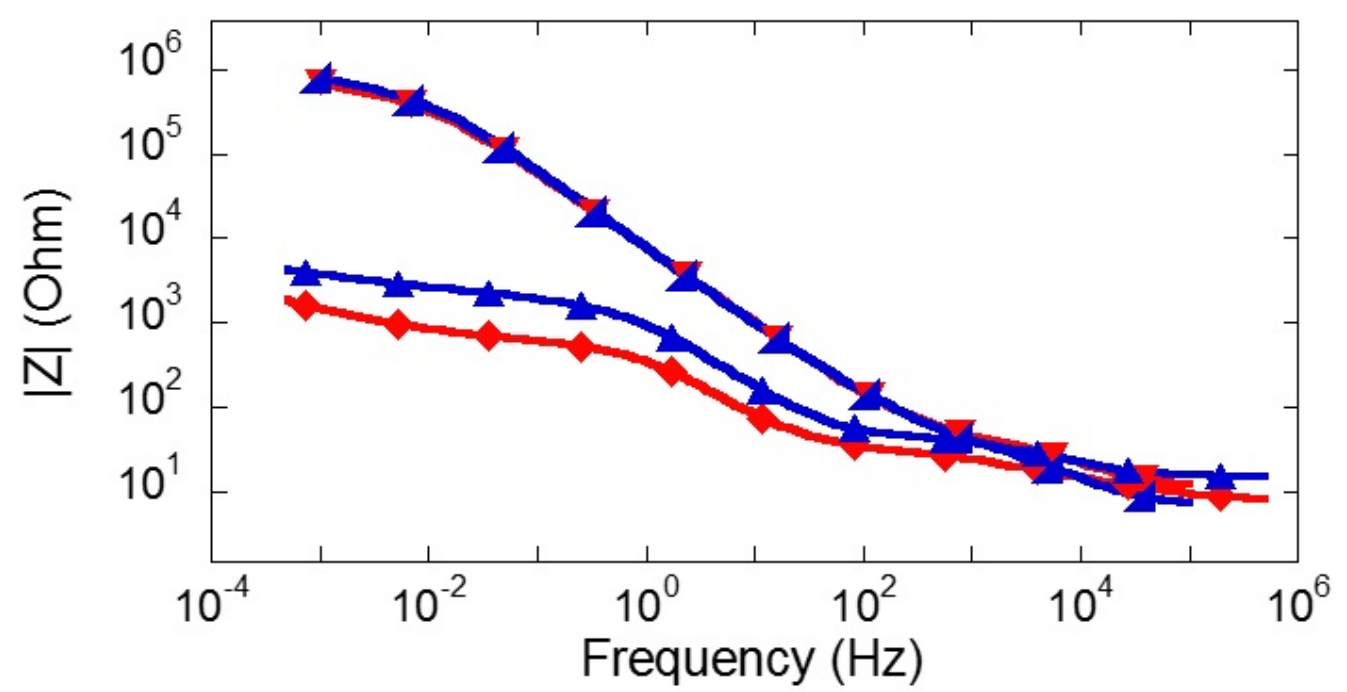

Supplement: c4cp01220h2.pdf [file c4cp01220h2.pdf]
